# Supplementary material for: Proline Metabolism in WHO G4 Gliomas Is Altered as Compared to Unaffected Brain Tissue
Source: MDPI journal article supplement (doi:10.3390/cancers16020456), 2024-01-21
Supplement: s1 [file s1]

## Proline Metabolism in WHO G4 Gliomas is Altered as Compared to Unaffected Brain Tissue.

Magdalena M. Sawicka<sup>1\*</sup>, Karol Sawicki<sup>2</sup>, Marek Jadeszko<sup>2</sup>, Katarzyna Bielawska<sup>1</sup>, Elżbieta Supruniuk<sup>3</sup>, Joanna Reszeć<sup>4</sup>, Izabela Prokop-Bielenia<sup>5</sup>, Barbara Polityńska<sup>6</sup>, Mateusz Jadeszko<sup>7</sup>, Magdalena Rybaczek<sup>2</sup>, Eryk Latoch<sup>8</sup>, Krzysztof Gorbacz<sup>2</sup>, Tomasz Łyson<sup>2</sup> and Wojciech Miltyk<sup>1</sup>

<sup>1</sup> Department of Analysis and Bioanalysis of Medicines, Medical University of Białystok, Mickiewicza 2D, 15-222 Białystok, Poland, magdalena.sawicka@umb.edu.pl (M.M.S.); katarzyna.bielawska@umb.edu.pl (K.B.); wojciech.miltyk@umb.edu.pl (W.M.)

<sup>2</sup> Department of Neurosurgery, Medical University of Białystok, Skłodowskiej-Curie 24A, 15-276 Białystok, Poland, karol.sawicki@umb.edu.pl (K.S.); mjadeszko63@gmail.com (M.J.<sup>2</sup>); magdalenarybaczek@interia.pl (M.R.); krzysztofgorbacz@interia.pl (K.G.); tomasz.lyson@umb.edu.pl (T.Ł.)

<sup>3</sup> Department of Physiology, Medical University of Białystok, Mickiewicza 2C, 15-222 Białystok, Poland, elzbieta.supruniuk@umb.edu.pl (E.S.)

<sup>4</sup> Department of Medical Pathomorphology, Medical University of Białystok, Waszyngtona 13, 15-269 Białystok, Poland, joannareszec@gmail.com (J.R.)

<sup>5</sup> Department of Medicinal Chemistry, Medical University of Białystok, Mickiewicza 2D, 15-222 Białystok, Poland, izabela.prokop-bielenia@umb.edu.pl (I.P-B.)

<sup>6</sup> Department of Psychology and Philosophy, Medical University of Białystok, Szpitalna 37, 15-295 Białystok, Poland, barbara.politynska-lewko@umb.edu.pl (B.P.)

<sup>7</sup> Department of Vascular Surgery and Transplantation, Medical University of Białystok, Skłodowskiej-Curie 24A, 15-276 Białystok, Poland, mzjo96@gmail.com (M.J.<sup>7</sup>)

<sup>8</sup> Department of Pediatric Oncology and Hematology, Medical University of Białystok, Waszyngtona 17, 15-274 Białystok, Poland, eryk.latoch@umb.edu.pl (E.L.)

\* Corresponding author.: magdalena.sawicka@umb.edu.pl

Description of data: Blots, zymograms and LC-MS chromatograms are described in the result section.

Supplementary data analysis presented: LC-MS chromatogram of internal standard (proline d3, **Figure 6.**), representative blots from Western Immunoblot (**Figure 3A**), representative zymogram from zymography (**Figure 4B**).

# 1. LC-MS chromatogram of internal standard (proline d<sub>3</sub>).

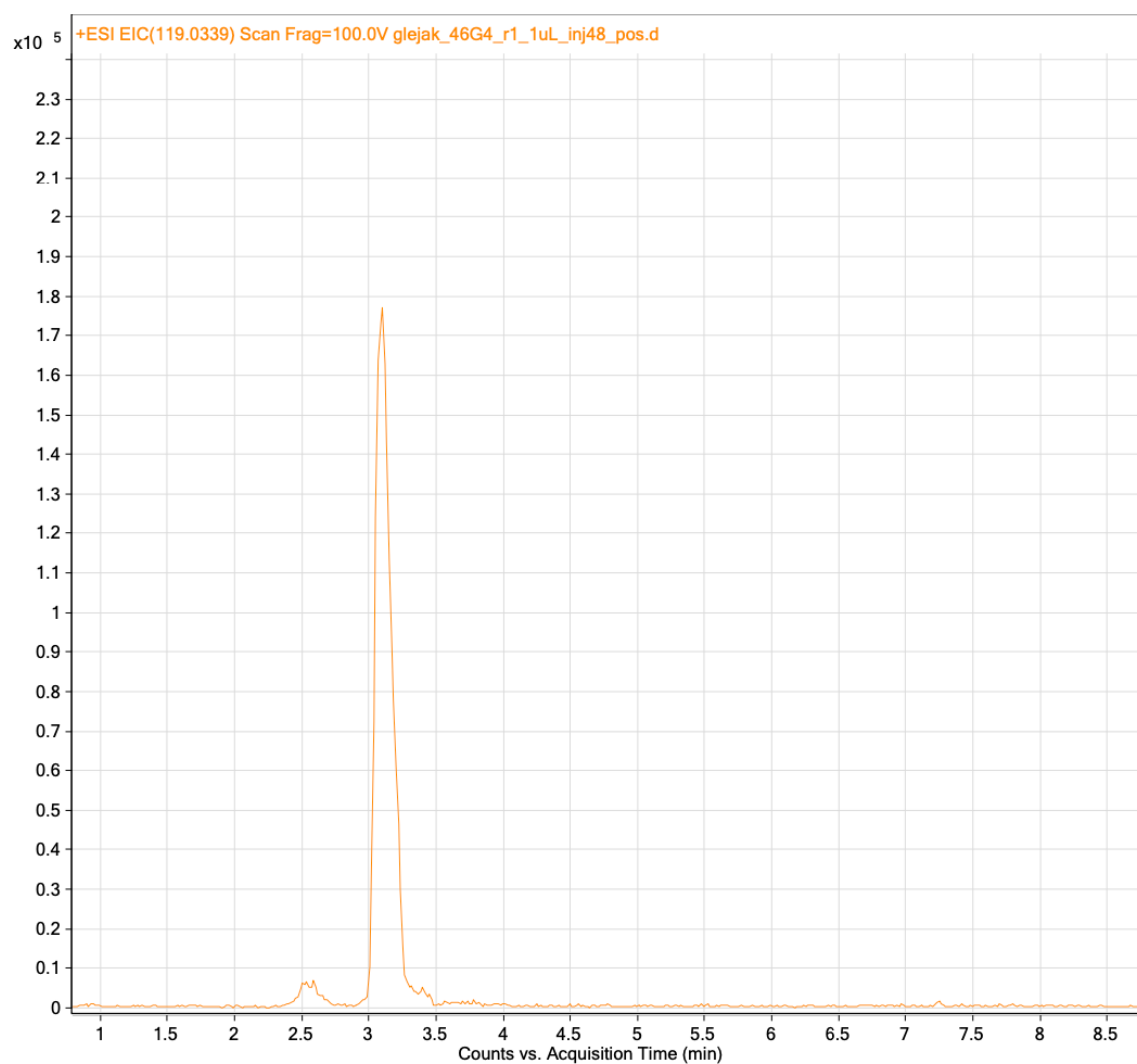

**Figure S1.** LC-MS chromatogram of proline d<sub>3</sub> (Pro-d<sub>3</sub>, internal standard, C<sub>is</sub>=30μM)

2. Representative blots from Western Immunoblot analysis presented in Figure 3A.

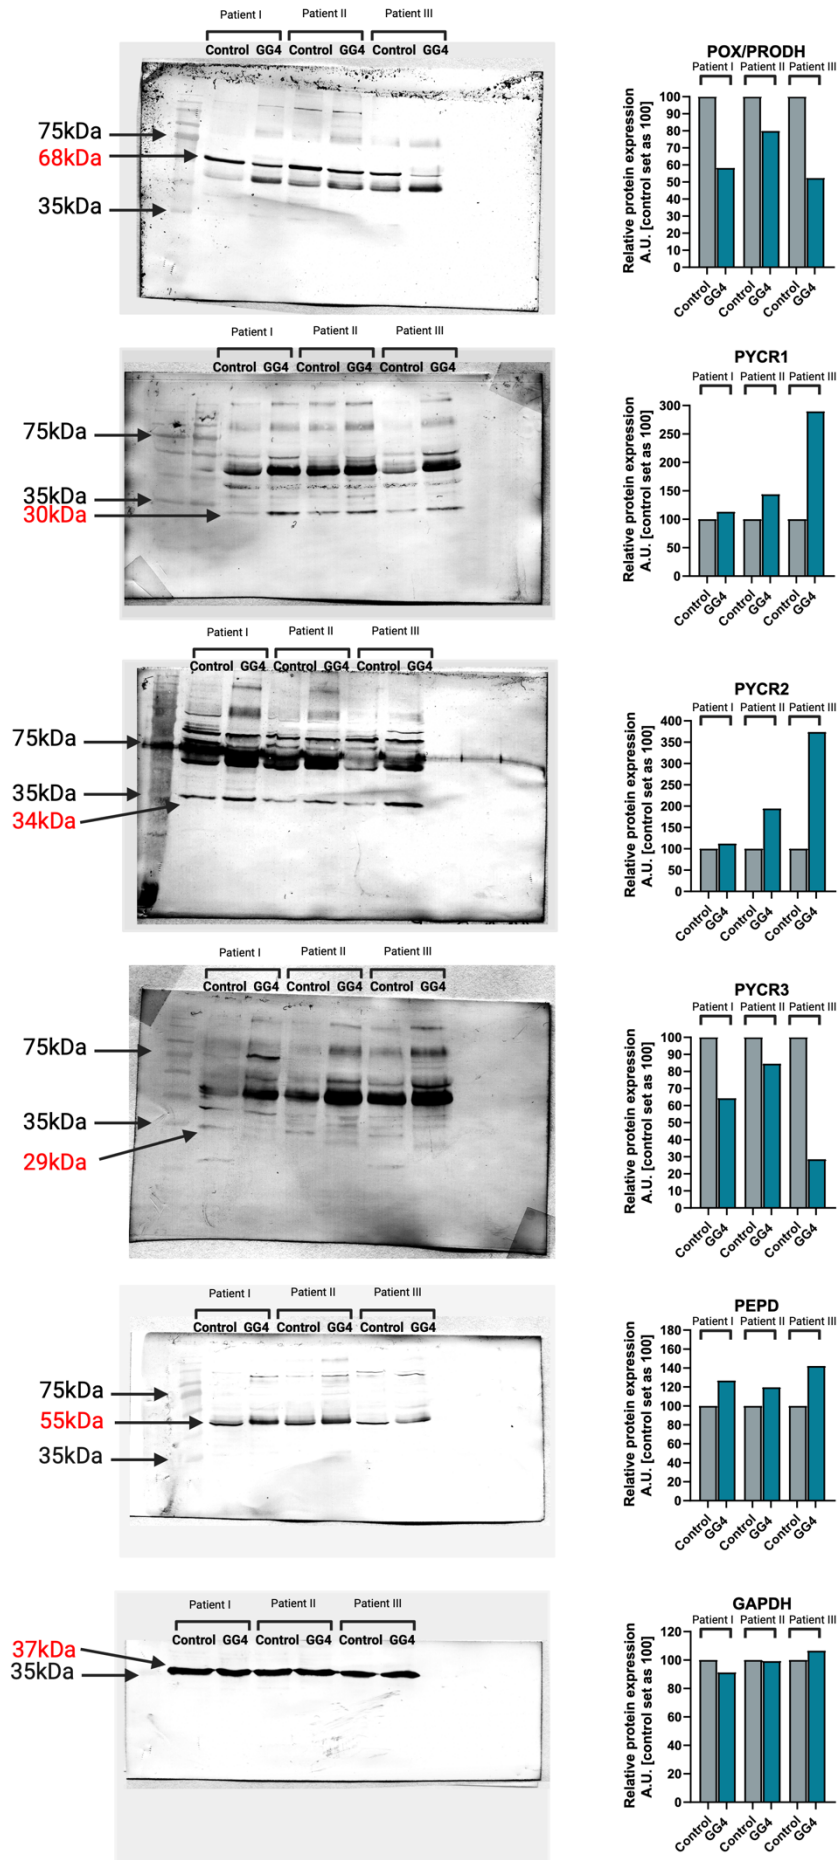

**Figure S2.** The POX/PRODH (68kDa), PYCR1 (30kDa), PYCR2 (34kDa), PYCR3 (29kDa), PEPD (55kDa) and GAPDH (37kDa) expression of three representative patients. GAPDH expression was used as a loading control. The WB bands intensity of representative blots was quantified by densitometry with ImageJ software (<https://imagej.nih.gov/ij/>, National Institutes of Health, Bethesda, MD, USA). Created with BioRender.com

**3. Representative zymogram from gelatin zymography analysis presented in Figure 4B.**

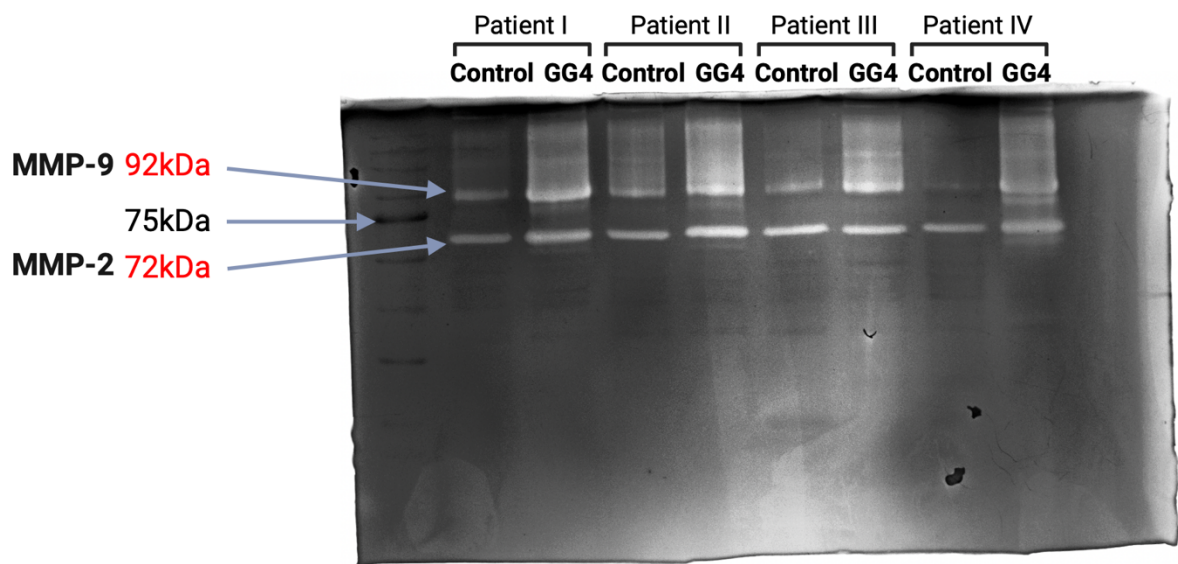

**Figure S3.** The MMP-2 and MMP-9 activity of four representative patients. The intensity of bands was semi-quantitatively calculated with ImageJ software (<https://imagej.nih.gov/ij/>, National Institutes of Health, Bethesda, MD, USA). Created with BioRender.com
